# Supplementary material
Source: Springer Nature journal article supplement (https://www.springermedizin.de/resource/supplementary/12881_2012_1074_MOESM2_ESM.pdf/9451920)
Supplement: MOESM2 [file 9451920]

|     |     |     |     |     |     |     |     |     |     |     |     |     |     |     |     |     |    |
|-----|-----|-----|-----|-----|-----|-----|-----|-----|-----|-----|-----|-----|-----|-----|-----|-----|----|
| 28  | 29  | 30  | 31  | 32  | 33  | 34  | 35  | 36  | 37  | 38  | 39  | 40  | 41  | 42  | 43  | 44  | 45 |
| G   | V   | N   | T   | Y   | N   | C   | R   | C   | P   | P   | E   | W   | T   |     |     |     |    |
| GGC | GTG | AAC | ACC | TAC | AAC | TGC | CGC | TGC | CCG | CCA | GAG | TGG | ACA | G   |     |     |    |
| GGC | GTG | AAC | ACC | TAC | AAC | TGC | CGC | TGC | CCG | CCA | GAG | TGG | ACA | GGC | GCG | TAT | AC |
| GGC | GTG | AAC | ACC | TAC | AAC | TGC | CGC | TGC | CCG | CCA | GAG | TGG | ACA | GGC | GCG | TAT | AC |
|     |     |     |     |     |     |     |     |     | ?   |     |     |     |     |     |     |     |    |
| GGC | GTG | AAC | ACC | TAC | AAC | TGC | CGC | TGC | CCG | CCA | GAG | TGG | ACA | GGC | GCG | TAT | AC |
| G   | V   | N   | T   | Y   | N   | C   | R   | C   | LP  | P   | E   | W   | T   | G   | A   | Y   | T  |

## Proband A

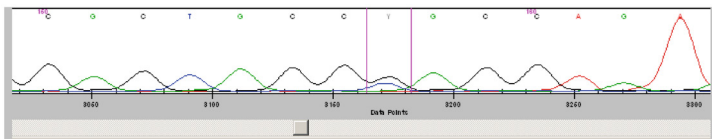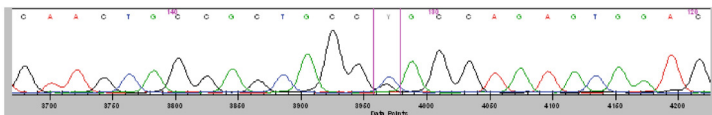

|     |     |     |     |     |     |     |     |     |     |     |     |     |     |     |     |     |     |
|-----|-----|-----|-----|-----|-----|-----|-----|-----|-----|-----|-----|-----|-----|-----|-----|-----|-----|
| 82  | 83  | 84  | 85  | 86  | 87  | 88  | 89  | 90  | 91  | 92  | 93  | 94  | 95  | 96  | 97  | 98  | 99  |
| A   | H   | G   | Q   | Q   | M   | I   | F   | P   | Y   | Y   | G   | R   | E   | E   | E   | L   | R   |
| GCA | CAC | GGC | CAG | CAG | ATG | ATC | TTC | CCC | TAC | TAC | GGC | CGC | GAG | GAG | GAG | CTG | CGC |
| GCA | CAC | GGC | CAG | CAG | ATG | ATC | TTC | CCC | TAS | TAC | GGC | CGC | GAG | GAG | GAG | CTG | CGC |
| GCA | CAC | GGC | CAG | CAG | ATG | ATC | TTC | CCC | TAS | TAC | GGC | CGC | GAG | GAG | GAG | CTG | CGC |

|     |     |     |     |     |     |     |     |     |     |     |     |     |     |     |     |     |     |
|-----|-----|-----|-----|-----|-----|-----|-----|-----|-----|-----|-----|-----|-----|-----|-----|-----|-----|
|     |     |     |     |     |     |     |     |     |     | ?   |     |     |     |     |     |     |     |
| GCA | CAC | GGC | CAG | CAG | ATG | ATC | TTC | CCC | TAS | TAC | GGC | CGC | GAG | GAG | GAG | CTG | CGC |
| A   | H   | G   | Q   | Q   | M   | I   | F   | P   | XY  | Y   | G   | R   | E   | E   | E   | L   | R   |

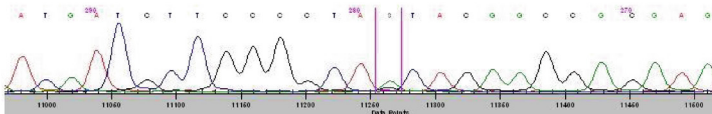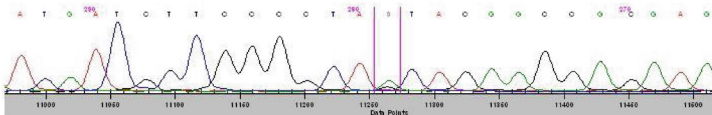

## Proband I
